# Supplementary material for: A Loss of Function Screen of Epigenetic Modifiers and Splicing Factors during Early Stage of Cardiac Reprogramming
Source: Hindawi journal article supplement (doi:10.1155/2018/3814747), 2018-01-01
Supplement: f1 [file 3814747.f1.pdf]

Figure S1

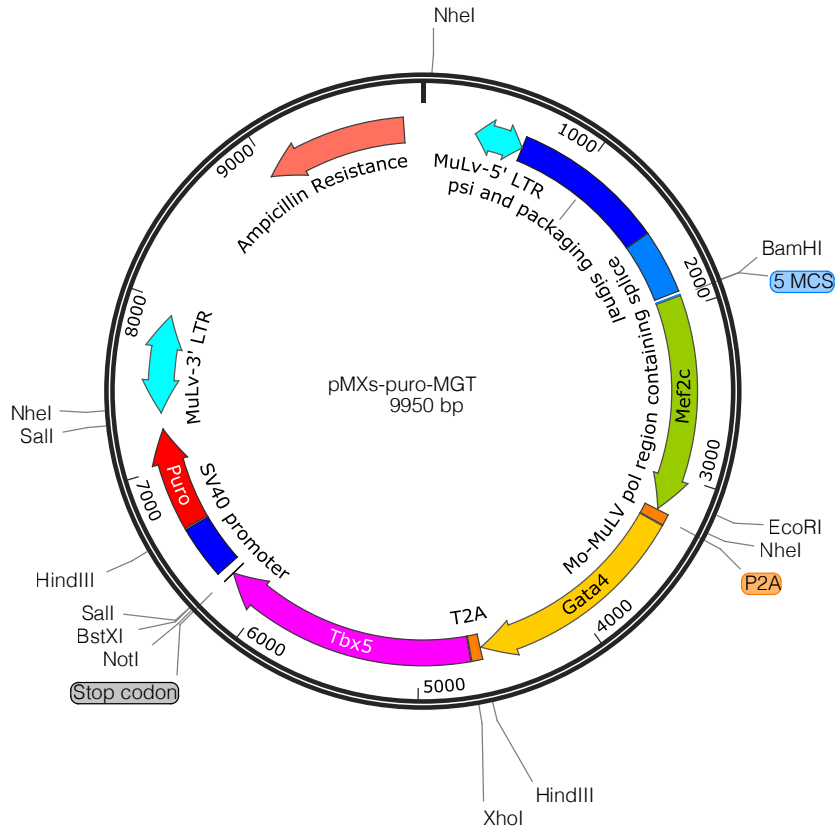

**Table S1. Sequences of shRNA oligoes used for RNAi screen.**

| shRNA library for screen |                | Names and sequences of shRNAs cloned in pLKO.1 vector         |
|--------------------------|----------------|---------------------------------------------------------------|
| Target Gene Symbol       | TRC Id         | Target Sequence (Sense)                                       |
| shKdm5c_1                | TRCN0000295415 | CCGGAGCAAGCTACCCGGGAATATACTCGAGTATATTCGCCGGTAGCTTGCTTTTTTTG   |
| shKdm5c_2                | TRCN0000295348 | CCGGATATTCTGACTCCAAGGTATTCTCGAGAATACCTTGGAGTCAGAATATTTTTTTG   |
| shKdm5c_3                | TRCN0000287995 | CCGGCGCATTGTTTTATCCCTATGAACTCGAGTTCATAGGGATAAAACAATGCGTTTTTTG |
| shKdm5c_4                | TRCN0000287921 | CCGGCGCTCTCACTATGAACGCATTCTCGAGAATGCGTTCATAGTGAGAGCGTTTTTTG   |
| shKdm5c_5                | TRCN0000287994 | CCGGGCCAATATCCAGTCTCTCAACTCGAGTTGAGAGACTGGATATTGGGCTTTTTTG    |
| shKdm5c_6                | TRCN0000097857 | CCGGCGCATTGTTTTATCCCTATGAACTCGAGTTCATAGGGATAAAACAATGCGTTTTTTG |
| shKdm5c_7                | TRCN0000097858 | CCGGCGCTCTCACTATGAACGCATTCTCGAGAATGCGTTCATAGTGAGAGCGTTTTTTG   |
| shKdm5c_8                | TRCN0000097859 | CCGGGCCAATATCCAGTCTCTCAACTCGAGTTGAGAGACTGGATATTGGGCTTTTTTG    |
| shKdm5c_9                | TRCN0000097856 | CCGGGCATTGTTTTATCCCTATGAACTCGAGTTCATAGGGATAAAACAATGCTTTTTTG   |
| shKdm5d_1                | TRCN0000098105 | CCGGCCTAAGAAGTATTCCCTGTATCTCGAGATACAGGGAATACTTCTTAGGTTTTTTG   |
| shKdm5d_2                | TRCN0000098106 | CCGGCCTTTACTACACCTATCTTATCTCGAGATAAGATAGGTGTAGTAAAGGTTTTTTG   |
| shKdm5d_3                | TRCN0000098107 | CCGGGCAGAACACTTAGAGGATGTACTCGAGTACATCCTCTAAGTGTCTGCTTTTTTG    |
| shKdm5d_4                | TRCN0000098108 | CCGGGCAATGTAACACAGATCCATTCTCGAGAATGGATCTGTGTACATTGCTTTTTTG    |
| shKdm5d_5                | TRCN0000098109 | CCGGGCCTGTTATGACTGTCCAGATCTCGAGATCTGGACAGTCATAACAGGCTTTTTTG   |
| shMll1_1                 | TRCN0000304329 | CCGGACGAAGATGACTTATACTATTCTCGAGAATAGTATAAGTCATCTTCGTTTTTTTG   |
| shMll1_2                 | TRCN0000310900 | CCGGCTGATTTCGAAACCAATATTTCTCGAGAAATATTGGTTTTCGAATCAGTTTTTTG   |
| shMll1_3                 | TRCN0000301690 | CCGGCGCCTTCACTTGACCATAATTCTCGAGAATATGGTCAAGTGAAGGCGTTTTTTG    |
| shMll2_1                 | TRCN0000239234 | CCGGGTTTCATCGAGTTGCGACATAACTCGAGTTATGTGCGAACTCGATGAACTTTTTTG  |
| shMll2_2                 | TRCN0000239233 | CCGGGACTGGTCTAGCCGATGTAACTCGAGTTTACATCGGCTAGACCAGTCTTTTTTG    |
| shMll2_3                 | TRCN0000239232 | CCGGCACCCACACTACCTCATTACTCGAGTAAATGAGGTAGGTGTGGGTGTTTTTTG     |
| shMll5_1                 | TRCN0000241161 | CCGGACTCCAACCTCAATCACTTTACTCGAGTAAAGTGATTGAAGTTGGAGTTTTTTTG   |
| shMll5_2                 | TRCN0000241164 | CCGGGCAACTTCTGGAGCGTTATTTCTCGAGAAATAACGCTCCAGAAGTTGCTTTTTTG   |
| shMll5_3                 | TRCN0000241165 | CCGGATGCAGTGTTGGCAACATATCTCGAGATATGTTGCCAAACTGCATTTTTTTG      |
| shPhf23_1                | TRCN0000238013 | CCGGTGGGATCTGATCACGTGTTACCTCGAGGTAACACGTGATCAGATCCCATTTTTTG   |
| shPhf23_2                | TRCN0000238016 | CCGGGCGGAGAACCATTGAGGATTTCTCGAGAAATCCTCAATGGTTCTCCGCTTTTTTG   |
| shPhf23_3                | TRCN0000238017 | CCGGCCACTCTCTCCACATCATTTGCTCGAGCAATGATGTGGGAGAGAGTGGTTTTTTG   |
| shCtcf_1                 | TRCN0000039019 | CCGGGCAGAGAAAGTAGTTGGTAATCTCGAGATTACCAACTACTTTCTCTGCTTTTTTG   |
| shCtcf_2                 | TRCN0000039020 | CCGGCGGAACACAATGGCAAGACATCTCGAGATGCTTGGCATTGTGTTCCGTTTTTTG    |
| shCtcf_3                 | TRCN0000039021 | CCGGCCCATTAACATAGGAGAGCTTCTCGAGAAGCTCTCCTATGTTAATGGGTTTTTTG   |
| shCtcf_4                 | TRCN0000039022 | CCGGCCGATGATATGTCACACCTTACTCGAGTAAAGTGTGACATATCATCGGTTTTTTG   |
| shCtcf_5                 | TRCN0000039023 | CCGGGCCATCATTCAGGTGCAAGATCTCGAGATCTTCGACCTGAATGATGGCTTTTTTG   |
| shBcor11_1               | TRCN0000085728 | CCGGGCCTTATCAATGCCAGCATTACTCGAGTAAATGCTGGCATTGATAAGGCTTTTTTG  |
| shBcor11_2               | TRCN0000085730 | CCGGGCACAGTGAATCCCGTTATACTCGAGTATAACGGGATTTCACTGTGCTTTTTTG    |
| shBcor11_3               | TRCN0000085731 | CCGGGCCACTCTAAGGAACCTATTCTCGAGAAATGAGTTCCTTAGAGTGGCTTTTTTG    |
| shBcor11_4               | TRCN0000085732 | CCGGTGGTCAATGACAACCTAGAATCGAGTTCAGGTTGTCTAGACTTGACCACTTTTTTG  |
| shBcor_1                 | TRCN0000081963 | CCGGCCCAGTGTGTACAGTGTGTTACTCGAGTAAACACACTGTACACAGTGGGTTTTTTG  |
| shBcor_2                 | TRCN0000081965 | CCGGCCCGGATATCCGTAGCAATTCTCGAGAATGCTACGGAAATCCGGGTTTTTTTG     |
| shBcor_3                 | TRCN0000081966 | CCGGCCACTTAGAAATGTACGATTCTCGAGAATCGTACAATTTCTAAGTGGTTTTTTG    |
| shBcor_4                 | TRCN0000081967 | CCGGCCAGAATTTGTGACCTACCAACTCGAGTTGGTAGGTACAAATTTCTGGTTTTTTG   |
| shRad21_1                | TRCN0000175873 | CCGGGCACCAGAAATTATGTGACTACTCGAGTAGTCACATAATTTCTGGTGCTTTTTTTG  |
| shRad21_2                | TRCN0000175503 | CCGGCCATGTATTTGAGTGCAACTTCTCGAGAAGTTGCACTCAAATACATGGTTTTTTTG  |
| shRad21_3                | TRCN0000174832 | CCGGGCTTAGCGATTATTCTGATATCTCGAGATATCAGAATAATCGTAAGCTTTTTTTG   |
| shRad21_4                | TRCN0000176084 | CCGGGATGAGTTCCTCAAAGAGTTTCTCGAGAAACTCTTTGAGGAACTCATCTTTTTTTG  |
| shRad21_5                | TRCN0000216543 | CCGGGCTTATAATGCCATTACTTTACTCGAGTAAAGTAATGGCATTATAAGCTTTTTTTG  |
| shStag2_1                | TRCN0000108975 | CCGGCGACCCTGAAATGTAGGATACTCGAGTATCCTACAATTTCCAGGTCGTTTTTTG    |
| shStag2_2                | TRCN0000108976 | CCGGGCGCTTCTTGACCTTATCAATCTCGAGATTGATAAGGTCAAGAAGCGCTTTTTTTG  |
| shStag2_3                | TRCN0000108977 | CCGGCCTCAACATTTAGTGGCATAACTCGAGTTATGCCACTAAATGTTGAGGTTTTTTG   |
| shStag2_4                | TRCN0000108978 | CCGGCCGATTTCTTTGATCCAGCTTCTCGAGAAGCTGGATCAAAGAAATCGGTTTTTTG   |
| shStag2_5                | TRCN0000108979 | CCGGCCTGATGAAGATGACGCATATCTCGAGATATGCGTCATCTTCATCAGGTTTTTTG   |
| shPhf12_1                | TRCN0000084419 | CCGGCCAACTCACTTCGAGCATTACTCGAGTAAATGCTCGAAGTGAGTTGGTTTTTTG    |
| shPhf12_2                | TRCN0000084420 | CCGGCGGAGAAATCGAGATAAATATCTCGAGATATTTATCTCGATTTCTCCGTTTTTTG   |
| shPhf12_3                | TRCN0000084422 | CCGGCCTGAACCGAATCCACAAGAACTCGAGTTCCTGTGGATTCCGTTCCAGTTTTTTG   |
| shSin3b_1                | TRCN0000039367 | CCGGCCGTATAGACATTTCCAAGAACTCGAGTTCCTGGGAATGTCTATACGGTTTTTTG   |
| shSin3b_2                | TRCN0000287547 | CCGGCCGTATAGACATTTCCAAGAACTCGAGTTCCTGGGAATGTCTATACGGTTTTTTG   |

|             |                |                                                               |
|-------------|----------------|---------------------------------------------------------------|
| shYy1_1     | TRCN0000054553 | CCGGCGACGGTTGTAATAAGAAGTTCTCGAGAACCTTCTTATTACAACCGTCGTTTTTTG  |
| shYy1_2     | TRCN0000054554 | CCGGCCCTAAGCAACTGGCAGAATTCTCGAGAATTCTGCCAGTTGCTTAGGGTTTTTTG   |
| shYy1_3     | TRCN0000054555 | CCGGGCCCTCATAAAGGCTGCACAACTCGAGTTGTGCAGCCTTTATGAGGGCTTTTTTG   |
| shYy1_4     | TRCN0000054556 | CCGGGTGGTTGAAGAGCAGATCATTCTCGAGAATGATCTGCTCTTCAACCACCTTTTTG   |
| shYy1_5     | TRCN0000054557 | CCGGCACATCTTAACACACGCCTAACTCGAGTTTAGCGTGTGTTAAGATGTGTTTTTG    |
| shRuvbl1_1  | TRCN0000115241 | CCGGGCTGGAGATGTGATTTACATTTCTCGAGAATGTAATCACATCTCCAGCTTTTTTG   |
| shRuvbl1_2  | TRCN0000115243 | CCGGGCTGGCAAAGATCAATGGCAACTCGAGTTGCCATTGATCTTTGCCAGCTTTTTTG   |
| shRuvbl1_3  | TRCN0000115244 | CCGGGCCACAGAGTTTGACCTTGAACCTCGAGTTCAAGGTCAAACCTCTGTGGCTTTTTTG |
| shRuvbl1_4  | TRCN0000115245 | CCGGCAAGATATTCTGTCTATGATCTCGAGATCATAGACAGAATATCTTGCTTTTTTG    |
| shRuvbl2_1  | TRCN0000115256 | CCGGCCGAGAACAGATCAATGCAAACCTCGAGTTTGCATTGATCTGTTCTCGTTTTTTG   |
| shRuvbl2_2  | TRCN0000115257 | CCGGTGTGACAAGAATCGAGCGAATCTCGAGATTCGCTCGATTCTTGTACATTTTTTG    |
| shRuvbl2_3  | TRCN0000115258 | CCGGCCTCCATGAGATTGACGTCACTCTCGAGATGACGTCAATCTCATGGAGGTTTTTTG  |
| shRuvbl2_4  | TRCN0000115259 | CCGGCGACACACCATTACAGCCATCTCGAGATGGCTGTGAATGGTGTGCTTTTTTG      |
| shRuvbl2_5  | TRCN0000115260 | CCGGGCCAGCCTGGTGTGCCGAAACTCGAGTTTCCGGCACACCAGGCTGGCTTTTTTG    |
| shSmarca5_1 | TRCN0000084429 | CCGGCCGAGCAAATAGATTTGAGTACTCGAGTACTCAAATCTATTTGCTCGTTTTTTG    |
| shSmarca5_2 | TRCN0000084430 | CCGGGTTTGGGAAAGACACTTCAAACCTCGAGTTTGAAGTGTCTTTCCCAAACCTTTTTG  |
| shSmarca5_3 | TRCN0000084431 | CCGGCGTCAATTTAAAGCTGATGTTCTCGAGAACATCAGCTTTAATTCGACGTTTTTTG   |
| shSmarca5_4 | TRCN0000084432 | CCGGCCCTTTCATCAGCTAAGAATACTCGAGTATTCTTAGCTGATGAAAGGGTTTTTTG   |
| shSmarca5_5 | TRCN0000295773 | CCGGTCACTAACTGGTAGTTCCTTACTCGAGTAAAGAACTACCAGTTAGTGATTTTTTG   |
| shTet1_1    | TRCN0000341917 | CCGGTCTAACAGTGTGCTAATATACTCGAGTATATTAGCACACTGGTTAGATTTTTTG    |
| shTet1_2    | TRCN0000341850 | CCGGCCTACGGGAAGCGACCATAATCTCGAGATTATGGTCGCTCCCGTAGGTTTTTTG    |
| shTet1_3    | TRCN0000341847 | CCGGCAACTTGCATCCACGATTAATCTCGAGATTAATCGTGGATGCAAGTTGTTTTTTG   |
| shTet1_4    | TRCN0000341849 | CCGGTAGCTATAGAGTATAGTAAACTCGAGTTTACTATACTCTATAGCTAGTTTTTTG    |
| shTet1_5    | TRCN0000341848 | CCGGTTTCAACTCCGACGTAAATATCTCGAGATATTTACGTCGGAGTTGAAATTTTTTG   |
| shTet2_1    | TRCN0000217530 | CCGGTGTGACTGTATAGGCATAAGCTCGAGCTTATGCCTATACAGTACAAGTTTTTTTG   |
| shTet2_2    | TRCN0000192770 | CCGGCAACTCATGGTCAATTCTTCTCGAGAAGAATTGACCCATGAGTTGGTTTTTTTG    |
| shTet2_3    | TRCN0000201087 | CCGGCGTGGACATTTGTCTTGAACCTCGAGTTTCAAGACAAATGTCAGCGTTTTTTTG    |
| shTet2_4    | TRCN0000250893 | CCGGTCGTGCTTTTGGCCAGATTAACCTCGAGTTTAACTCGGCCAAAGCACGATTTTTTG  |
| shTet2_5    | TRCN0000250895 | CCGGGAGCGTTCCTCAGTATCATTTCTCGAGAAATGATACTGAGGAACGCTCTTTTTTG   |
| shTrrap_1   | TRCN0000088534 | CCGGCCCAGCGCATTGAACCTGCTTTCTCGAGAAAGCAGTTCAATGCGCTGGGTTTTTTG  |
| shTrrap_2   | TRCN0000088535 | CCGGCATCAAGATCATAAGCATCATCTCGAGATGATGCTTATGATCTTGATGTTTTTTG   |
| shTrrap_3   | TRCN0000088536 | CCGGCGTGAACTTTACTCTCTGTTCTCGAGAACAGAGAGTAAAGTTTCCAGCGTTTTTTG  |
| shTrrap_4   | TRCN0000088537 | CCGGGTGTCAACTCAGTGTCCATTACTCGAGTAAATGGACACTGAGTTGACACTTTTTTG  |
| shSf1_1     | TRCN0000109275 | CCGGCCCAAGACGAATATCCAGAAACTCGAGTTTCTGGATATTCGTCTTGGGTTTTTTG   |
| shSf1_2     | TRCN0000109276 | CCGGGCGTAAAGATGGTCAGATGTTCTCGAGAACATCTGACCATCTTTACGCTTTTTTG   |
| shSf1_3     | TRCN0000109277 | CCGGCCGATGGAACCAAGACACAATCTCGAGATTGTGTCTTGGTTCCATCGGTTTTTTG   |
| shSf1_4     | TRCN0000109278 | CCGGTGTAGCATCGAGTGTCTTCTTCTCGAGAAGAAGACACTCGATGCTACATTTTTTG   |
| shSf1_5     | TRCN0000109279 | CCGGGCACGGATGGATAAAGAATACTCGAGATATCTTTATCCATCCGTCGTTTTTTG     |
| shSf3a1_1   | TRCN0000109205 | CCGGCCAGTCTACGGAATGAATATCTCGAGATATTCATTCCGTAGACTGGCTTTTTTG    |
| shSf3a1_2   | TRCN0000109206 | CCGGCCGAGTAGAATGGGCCAAATTTCTCGAGAATTTGGCCCATTCTACTCGGTTTTTTG  |
| shSf3a1_3   | TRCN0000109207 | CCGGCCGAGAGGACTATGATCCCAAACCTCGAGTTTGGGATCATAGTCTTCCGTTTTTTG  |
| shSf3a1_4   | TRCN0000109208 | CCGGCCAGGATCAATGTGGTACTTACTCGAGTAGGTACCACATTGATCCTGTTTTTTG    |
| shSf3a1_5   | TRCN0000109209 | CCGGCCTGAATTTGAAGCTAGGATCTCGAGATCCTAGCTTCAAATTCAGGCTTTTTTG    |
| shSf3b1_1   | TRCN0000109240 | CCGGCCTGCTTCAATCTGATGATATCTCGAGATATCATCAGATTGAAGCAGGTTTTTTG   |
| shSf3b1_2   | TRCN0000109241 | CCGGGCCCACTTTCTGATGAAGAATCTCGAGATTCTTTCATCAGAAAGTGGGCTTTTTTG  |
| shSf3b1_3   | TRCN0000109242 | CCGGCGCAGCAGATATTGACCATAACTCGAGTTATGGTCAATATCTGCTGCGTTTTTTG   |
| shSf3b1_4   | TRCN0000109243 | CCGGGCCGAGAGATTATTTCTAATTTCTCGAGAATTAGAAATAATCTCTCGGCTTTTTTG  |
| shSf3b1_5   | TRCN0000109244 | CCGGGCTGCTTAAATGAATGAATACTCGAGTATTCATTCAATTAAGGCAGGCTTTTTTG   |
| shU2af1_1   | TRCN0000123549 | CCGGCCTCTTGAACATTTACCGTAACTCGAGTTACGGTAAATGTTCAAGAGGTTTTTTG   |
| shU2af1_2   | TRCN0000123550 | CCGGCGACTTGAATAACCGTTGGTTCTCGAGAACCAACGGTTATTTCAAGTCGTTTTTTG  |
| shU2af1_3   | TRCN0000123551 | CCGGCCAACCTTTAGCCAGACCATTCTCGAGAATGGTCTGGCTAAAGGTTGGTTTTTTG   |
| shU2af1_4   | TRCN0000123552 | CCGGGCCCTCTTGAACATTTACCGTCTCGAGACGGTAAATGTTCAAGAGGGCTTTTTTG   |
| shU2af1_5   | TRCN0000123553 | CCGGCCAGTAACCTGACTTCAGGGAACTCGAGTTCCCTGAAGTCAGTTACTGGTTTTTTG  |
| shZrsr2_1   | TRCN0000126324 | CCGGCGAGAGATACTTACCAAGTAACTCGAGTACTTGGTAAGTATCTCTCGTTTTTTG    |
| shZrsr2_2   | TRCN0000126325 | CCGGCCTTTACCCTAAGTAAGTTATCTCGAGATAACTTACTTAGGGTAAAGGTTTTTTG   |
| shZrsr2_3   | TRCN0000126326 | CCGGGAAGAAGTACAGAGAAAGTTACTCGAGTAACTTTCTCTCTAGTTCTTCTTTTTTG   |
| shZrsr2_4   | TRCN0000126327 | CCGGTGGTGAATGACAGATACCTTCTCGAGAAGGTATCTGTCTATGCACCATTTTTTG    |
| shZrsr2_5   | TRCN0000126328 | CCGGTGGAAACACTAGTTTCCAAATCTCGAGATTGGAAACTAGTGTTCATTTTTTG      |

---

**Table S2. List of Primers and Taqman Probes.**

**Names and sequences of primers for gene expression**

| Gene name      | Sequence (Forward)       | Sequence (Reverse)      |
|----------------|--------------------------|-------------------------|
| <i>Gapdh</i>   | AGGTCGGTGTGAACGGATTTG    | TGTAGACCATGTAGTTGAGGTCA |
| <i>Myh6</i>    | GCAGAACAGTAAAATTGAGGACG  | CGCAGCTTCTCCACCTTAG     |
| <i>Tnnt2</i>   | CAGAGGAGGCCAACGTAGAAG    | CTCCATCGGGGATCTTGGGT    |
| <i>Actc1</i>   | CTGGATTCTGGCGATGGTGTGA   | CGGACAATTTACGTTTCAGCA   |
| <i>Actn2</i>   | TGGCACCCAGATCGAGAAC      | GTGGAACCCGATTTTTCCCC    |
| <i>Col1a1</i>  | GCTCCTCTTAGGGGCCACT      | CCACGTCTCACCATTGGGG     |
| <i>Sf3a1</i>   | AAGAAGAAGCATCGTCAAAGGAG  | GCATGGTAAGGGTCATTGGGA   |
| <i>Sf3b1</i>   | GTGGGCCTTGATTCCACAGG     | GGCTTCTTCTGACCCGAGCAA   |
| <i>Yy1</i>     | TCAGACCCTAAGCAACTGGC     | GTGCAGCCTTTATGAGGGCAA   |
| <i>Smarca5</i> | GACACCGAGATGGAGGAAGTA    | CGAACAGCTCTGTCTGCTTTA   |
| <i>Mil2</i>    | TAAAACCGCCTATGGAGGACC    | GGCGCATCAATGGGGATCT     |
| <i>Mil5</i>    | TTTCCAGACCTCCTGTAGAGAGC  | AAAAGTCTTCGCATCAACACA   |
| <i>Tet1</i>    | ACACAGTGGTGCTAATGCAG     | AGCATGAACGGGAGAATCGG    |
| <i>Ctcf</i>    | TTTGGATCGTCACATGAAAAGCC  | ACAAAGGCCATATCGCAGTCT   |
| <i>Mil1</i>    | ATGAGCAGTTCTTAGGTTTTGGC  | CTCCCCGCGAGGTTTTCGAG    |
| <i>Kdm5d</i>   | TTTCGGTCCCCTACGAACG      | TTCCCTCGTCTACTGTAGCAACT |
| <i>Phf12</i>   | GGGGCTGATGGAGCAAATCC     | CCACCTTCTTGCAGCTATCG    |
| <i>Sin3b</i>   | GTGGAGGACGCTCTCACCTA     | CGATGCTCTGGCTTTTGAACT   |
| <i>Bcor1</i>   | CGCATGTGTGGCATCAACG      | TCCCAACATAGTCCATTTTTGGC |
| <i>Ruvbl2</i>  | GCCACCACCAAAGTCCCTG      | CCCTTCTCGGATCATCTCCAG   |
| <i>Tet3</i>    | TGCGATTGTGTCGAACAAATAGT  | TCCATACCGATCCTCCATGAG   |
| <i>Rad21</i>   | GCCCATGTATTTGAGTGCAACT   | ATAGATGCGGACTACTCCAG    |
| <i>Sf1</i>     | GAGAGTTCGGTACCCGCAAAA    | CTCTGGGTCCAATTAGGAGCC   |
| <i>Trrap</i>   | CAACGCCAGATCGGACTG       | GAGGCTTTTGTAAACAGGGCAG  |
| <i>U2af1</i>   | TCGGAGCATGTCGTCTATGG     | GGAAGAGTTTTGAGGGTTACGG  |
| <i>Kdm5c</i>   | GAGGCCCAGACAAGAGTGAAA    | TTGGGAATCTTTAAGGATGAGCC |
| <i>Phf23</i>   | CACATCATTTGACGCATACTTCCC | TTTCGGTCTTCTTTTCGAGGC   |
| <i>Phf23</i>   | CACATCATTTGACGCATACTTCCC | TTTCGGTCTTCTTTTCGAGGC   |
| <i>Stag2</i>   | CTACAAGCATGACCCGGGACAT   | GCCGTAATAACACACCAATGAAC |
| <i>Ruvbl1</i>  | AGCTGGGCAGTAAAGTCCCT     | CCTCCCCCTTCATAAACCTCCT  |
| <i>Bcor</i>    | CTTTCTGCAACCCCTCTGTATG   | AAGCGTCGCCATCATTCACA    |

**Applied Biosystems Taqman probes**

| Gene           | Vendor             | Product       |
|----------------|--------------------|---------------|
| <i>Gapdh</i>   | applied biosystems | Mm99999915_g1 |
| <i>Scn5a</i>   | applied biosystems | Mm01342518_m1 |
| <i>Kcnj2</i>   | applied biosystems | Mm00434616_m1 |
| <i>Cacna1c</i> | applied biosystems | Mm00437917_m1 |
| <i>Col1a2</i>  | applied biosystems | Mm00483888_m1 |
| <i>Col3a1</i>  | applied biosystems | Mm01254476_m1 |
| <i>Postn</i>   | applied biosystems | Mm00450111_m1 |
